# Supplementary material
Source: PubMed Central journal article supplement (PMC1965520)

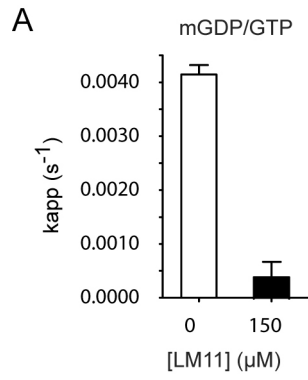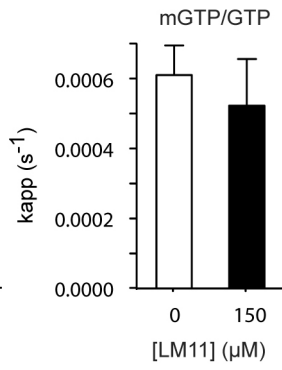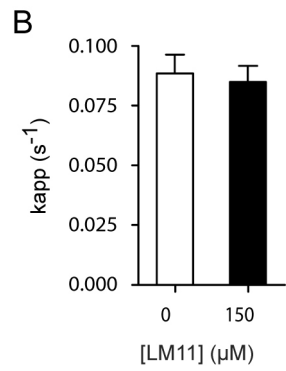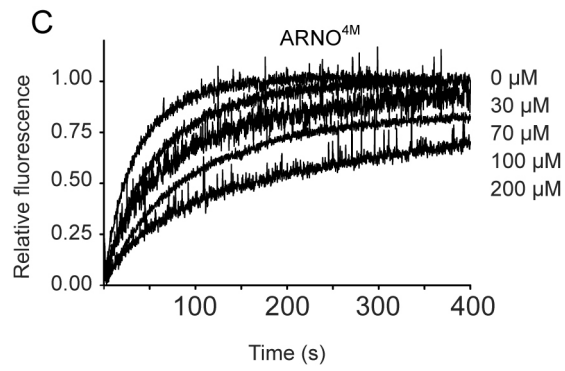

Supplement: pnas_0700773104_1.pdf [file pnas_0700773104_1.pdf]

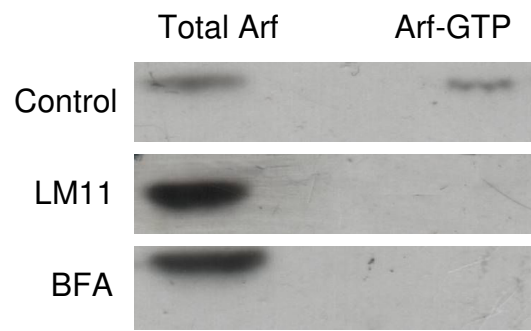

Supplement: pnas_0700773104_2.pdf [file pnas_0700773104_2.pdf]

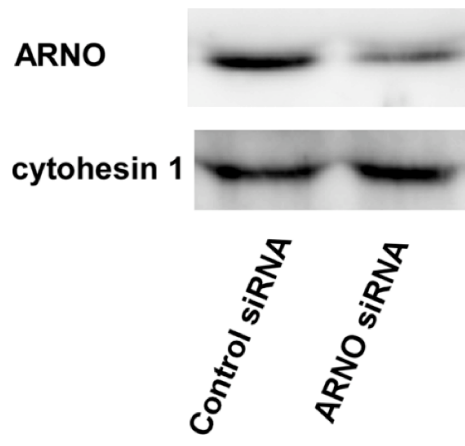

Supplement: pnas_0700773104_3.pdf [file pnas_0700773104_3.pdf]
